# Supplementary material for: The synthesis of tris(perfluoroalkyl)phosphines
Source: Royal Society of Chemistry journal article supplement (doi:10.1039/b507752d), 2005-01-01

# Supplementary Material (ESI) for Chemical Communications  
# This journal is © The Royal Society of Chemistry 2005

**Electronic Supplementary Information**

**The synthesis of tris(perfluoroalkyl)phosphines**

**Makeba B. Murphy-Jolly, Lesley C. Lewis and Andrew J. M. Caffyn\***

## Experimental

### General

Manipulations were carried out under argon using standard Schlenk techniques. Solvents were distilled from the appropriate drying agents and stored over 4 Å molecular sieves before use.  $^{31}\text{P}$ ,  $^{19}\text{F}$ ,  $^{13}\text{C}$  and  $^1\text{H}$  NMR were recorded on a Bruker 400 MHz spectrometer with 85%  $\text{H}_3\text{PO}_4$ ,  $\text{CCl}_3\text{F}$  and  $\text{SiMe}_4$  as external references respectively.

### Materials

$\text{P}(\text{OPh})_3$  was purchased from Aldrich (3kg, US\$103).  $\text{PhP}(\text{OPh})_2$ ,  $\text{Ph}_2\text{POPh}$  and  $(\text{PhO})_2\text{PCH}_2\text{CH}_2\text{P}(\text{OPh})_2$  were obtained by reaction of  $\text{PhPCl}_2$  (Strem, 1 kg, US\$88),  $\text{Ph}_2\text{PCl}$  (Strem, 1 kg, US\$242) and  $\text{Cl}_2\text{PCH}_2\text{CH}_2\text{PCl}_2$  (Strem, 10 g, US\$172) respectively, with phenol in the presence of  $\text{NEt}_3$ .<sup>1,2</sup>  $\text{NaOPh}$  was made by reaction of phenol with sodium. Caesium fluoride can be purchased from Apollo (500 g, £130). Tetrabutylammonium triphenyldifluorosilicate (TBAT) was purchased from Aldrich (5 g, US\$48.50).  $\text{P}(\text{OC}_6\text{H}_4\text{CN})_3$  was made by reaction of  $\text{PCl}_3$  with  $\text{HOC}_6\text{H}_4\text{CN}$  (Alfa, 100 g, US\$70.80) in the presence of  $\text{NEt}_3$ . The silanes  $\text{CF}_3\text{SiMe}_3$  (Apollo, 100 g, US\$100),  $\text{C}_2\text{F}_5\text{SiMe}_3$  (Hansa, 1 g, US\$78),  $\text{C}_3\text{F}_7\text{SiMe}_3$  (Aldrich, 1 g, US\$47.50) are commercially available. We made all the silanes described, from the corresponding perfluoroalkyl iodide and chlorotrimethylsilane in the presence of tetrakis(dimethylamino)ethylene (Lancaster, 50 g, US\$30) using Petrov's procedure in 40-75% yields.<sup>3</sup> The cost of the perfluoroalkyl iodides is as follows:  $\text{CF}_3\text{I}$  (Apollo, 500 g, £264),  $\text{C}_2\text{F}_5\text{I}$  (Apollo, 500 g, £220),  $\text{C}_3\text{F}_7\text{I}$  (Apollo, 100 g, £106),  $\text{C}_4\text{F}_9\text{I}$  (Apollo, 100 g, £45) and  $\text{C}_6\text{F}_{13}\text{I}$  (Apollo, 500 g, £114).

### Synthesis of $\text{Ph}_2\text{PCF}_3$

$\text{Ph}_2\text{P}(\text{OPh})$  (0.049 g, 0.18 mmol) was added to a mixture of dried  $\text{CsF}$  (0.016 g, 0.1 mmol) in ether (0.4 ml) under argon in an NMR tube.  $\text{CF}_3\text{SiMe}_3$  (0.038 g, 0.27 mmol) was added, and the reaction closed and sealed. The reaction was monitored by  $^{31}\text{P}$  NMR, which showed quantitative yield on completion.  $^{31}\text{P}$  NMR:  $\delta$  1.7 (q,  $^2J_{\text{PF}} =$

74 Hz) [lit.<sup>4</sup> (CDCl<sub>3</sub>) 2.7 (q, <sup>2</sup>J<sub>PF</sub> = 73 Hz)]. <sup>19</sup>F NMR: δ -56.8 (d, <sup>2</sup>J<sub>PF</sub> = 74 Hz) [lit.<sup>4</sup> (CDCl<sub>3</sub>) -55.3 (d, <sup>2</sup>J<sub>PF</sub> = 73 Hz)].

#### General procedure for the synthesis of PhP(CF<sub>3</sub>)<sub>2</sub> and PhP(C<sub>2</sub>F<sub>5</sub>)<sub>2</sub>

PhP(OPh)<sub>2</sub> (0.2 mmol) was added to a mixture of dried CsF (0.1 mmol) in ether (0.4 ml) under argon in an NMR tube. R<sub>f</sub>SiMe<sub>3</sub> (R<sub>f</sub> = CF<sub>3</sub>, C<sub>2</sub>F<sub>5</sub>) (0.54 mmol) was added, and the reaction closed and sealed. The reaction was monitored by <sup>31</sup>P NMR, which showed 90% yield on completion. **PhP(CF<sub>3</sub>)<sub>2</sub>**: <sup>31</sup>P NMR: δ 3.4 (septet, <sup>2</sup>J<sub>PF</sub> = 80 Hz) [lit.<sup>4</sup> (CDCl<sub>3</sub>) 0.7 (septet, <sup>2</sup>J<sub>PF</sub> = 80 Hz)]. <sup>19</sup>F NMR: δ -51.8 (d, <sup>2</sup>J<sub>PF</sub> = 83 Hz) [lit.<sup>4</sup> (CDCl<sub>3</sub>) -53.3 (d, <sup>2</sup>J<sub>PF</sub> = 80 Hz)]. **PhP(C<sub>2</sub>F<sub>5</sub>)<sub>2</sub>**: <sup>31</sup>P NMR: δ 3.3 (br, m) [lit.<sup>5</sup> (C<sub>6</sub>D<sub>6</sub>) 3.5 (m)]. <sup>19</sup>F NMR: δ -79.3 (d, <sup>3</sup>J<sub>PF</sub> = 17 Hz, CF<sub>3</sub>); -108.6 (d, <sup>2</sup>J = 54 Hz, CF<sub>2</sub>) [lit.<sup>5</sup> (C<sub>6</sub>D<sub>6</sub>) -79.63 (d, <sup>3</sup>J<sub>PF</sub> = 18 Hz, CF<sub>3</sub>); -108.7, -108.9 (AB portion of ABX spin system, <sup>2</sup>J<sub>FF</sub> ~ 300 Hz, <sup>2</sup>J<sub>PF</sub>(A) = 63 Hz, <sup>2</sup>J<sub>PF</sub>(B) = 35 Hz, CF<sub>2</sub>)].

#### General procedure for the synthesis of P(C<sub>3</sub>F<sub>7</sub>)<sub>3</sub> and P(C<sub>6</sub>F<sub>13</sub>)<sub>3</sub>

P(OC<sub>6</sub>H<sub>4</sub>CN)<sub>3</sub> (0.23mmol) was added to dried CsF (0.70mmol) in a 1:1 mixture of benzonitrile/ether (0.6 ml) under argon in an NMR tube. R<sub>f</sub>SiMe<sub>3</sub> (R<sub>f</sub> = C<sub>4</sub>F<sub>9</sub>, C<sub>6</sub>F<sub>13</sub>) (0.70mmol) was added. The reaction was exothermic and a separate layer of product was observed almost immediately. This was separated by syringe to give crude product.

**P(C<sub>3</sub>F<sub>7</sub>)<sub>3</sub>**: <sup>31</sup>P NMR: δ 21.6 (m) [lit.<sup>6</sup> 23.3(m)]. <sup>19</sup>F NMR: δ -79.6 (s); -101.1 (d, <sup>3</sup>J<sub>PF</sub> = 38 Hz); -120.5 (d, <sup>2</sup>J<sub>PF</sub> = 34 Hz) [lit.<sup>6</sup> -81.0 (s); -103.2 (d, <sup>2</sup>J<sub>PF</sub> = 37 Hz); -122.7 (d, <sup>3</sup>J<sub>PF</sub> = 30 Hz)]. **P(C<sub>6</sub>F<sub>13</sub>)<sub>3</sub>**: <sup>31</sup>P NMR: δ 27.9 (br) [lit.<sup>6</sup> 25.0 (m)]. <sup>19</sup>F NMR: δ -78.1 (s, CF<sub>3</sub>); -98.1(d, <sup>2</sup>J<sub>PF</sub> = 34 Hz, PCF<sub>2</sub>); -114.1 (d, <sup>3</sup>J<sub>PF</sub> unresolved, CF<sub>2</sub>); -118.4(s); -119.4 (s); -123.1 (s) [lit.<sup>6</sup> -83.2 (s); -102.8 (d, <sup>2</sup>J<sub>PF</sub> = 25 Hz); -118.8 (d, <sup>3</sup>J<sub>PF</sub> = 11 Hz); -123.2 (s); 124.3 (s); -128.0 (s)].

#### General procedure for the synthesis of (CF<sub>3</sub>)<sub>2</sub>PCH<sub>2</sub>CH<sub>2</sub>P(CF<sub>3</sub>)<sub>2</sub> and (C<sub>2</sub>F<sub>5</sub>)<sub>2</sub>PCH<sub>2</sub>CH<sub>2</sub>P(C<sub>2</sub>F<sub>5</sub>)<sub>2</sub>

R<sub>f</sub>SiMe<sub>3</sub> (R<sub>f</sub> = CF<sub>3</sub>, C<sub>2</sub>F<sub>5</sub>) (0.6mmol) was added to a mixture of dried CsF (0.3mmol), (PhO)<sub>2</sub>PCH<sub>2</sub>CH<sub>2</sub>P(OPh)<sub>2</sub> (0.15mmol) and ether (0.5 ml) in an NMR tube. The mixture

was shaken intermittently and allowed to stand overnight. The reaction was monitored by  $^{31}\text{P}$  NMR, which showed 95% ( $\text{R}_f = \text{CF}_3$ ) and 90% yield ( $\text{R}_f = \text{C}_2\text{F}_5$ ) on completion.  **$(\text{CF}_3)_2\text{PCH}_2\text{CH}_2\text{P}(\text{CF}_3)_2$** :  $^{31}\text{P}$  NMR:  $\delta$ -1.0 (m) [lit.<sup>7</sup> -3.2 (m)].  $^{19}\text{F}$  NMR:  $\delta$ -54.5 (d,  $^2J_{\text{PF}} = 83$  Hz) [lit.<sup>8</sup> -54.9 (d,  $^2J_{\text{PF}} = 74$  Hz)].  **$(\text{C}_2\text{F}_5)_2\text{PCH}_2\text{CH}_2\text{P}(\text{C}_2\text{F}_5)_2$** :  $^{31}\text{P}$  NMR:  $\delta$  6.41 (m) [lit.<sup>9</sup> ( $\text{C}_6\text{D}_6$ ) 7.4 (m)].  $^{19}\text{F}$  NMR:  $\delta$ -85.0 (s,  $\text{CF}_3$ ); -110.7 (m,  $^2J_{\text{PF}} = 45$  Hz) [lit.<sup>9</sup> ( $\text{C}_6\text{D}_6$ ) -82.3 (s,  $\text{CF}_3$ ); -112.1 (tm,  $^2J_{\text{PF}} = 43$  Hz,  $\text{CF}_2$ )].

### Isolation of $\text{Ph}_2\text{PC}_2\text{F}_5$

$\text{Ph}_2\text{P}(\text{OPh})$  (4.5 g, 16.3 mmol) was added to a mixture of dried  $\text{CsF}$  (1.09 g, 7.18 mmol) in ether (20 ml) under argon in an NMR tube.  $\text{C}_2\text{F}_5\text{SiMe}_3$  (3.4 g, 17.5 mmol) was added, and the reaction sealed. The reaction was monitored by  $^{31}\text{P}$  NMR, which showed quantitative yield overnight. Volatiles were pumped off to reduce the volume of the mixture. The crude product was removed by cannula filtration. Vacuum distillation of the filtrate at 89-93°C and 0.075 Torr (104-107°C and 0.2 Torr<sup>10</sup>) gave  $\text{Ph}_2\text{PC}_2\text{F}_5$  (4.0 g, 80%).  $^1\text{H}$  NMR ( $\text{C}_6\text{D}_6$ ):  $\delta$  7.60 (m, 2H); 7.02 (m, 3H) (Figure 1) [lit.<sup>10</sup> ( $\text{C}_6\text{D}_6$ ) 7.59 (m, 2H), 7.01 (m, 3H)].  $^{31}\text{P}$  NMR ( $\text{C}_6\text{D}_6$ ):  $\delta$ -2.4 (t,  $^2J_{\text{PF}} = 65$  Hz) [lit.<sup>10</sup> ( $\text{C}_6\text{D}_6$ ) -1.41 (tq,  $^2J_{\text{PF}} = 58.0$  Hz,  $^3J_{\text{PF}} = 17$  Hz)].  $^{19}\text{F}$  NMR  $\delta$ -80.7 (d,  $^3J_{\text{PF}} = 16.2$  Hz); -112.9 (d,  $^2J_{\text{PF}} = 57.2$  Hz) [lit.<sup>10</sup> ( $\text{C}_6\text{D}_6$ ) -80.4 (dt,  $^3J_{\text{PF}} = 16.5$  Hz,  $^3J_{\text{FF}} = 3.1$  Hz); -112.6 (tq,  $^2J_{\text{PF}} = 57.0$  Hz,  $^3J_{\text{FF}} = 3.1$  Hz)].  $^{13}\text{C}$  NMR: ( $\text{CDCl}_3$ )  $\delta$  135.3 (d,  $^1J_{\text{PC}} = 22$  Hz); 131.0 (s); 129.0 (s); 128.9 (s); 120.8 (tdq,  $^1J_{\text{CF}} = 288$  Hz,  $^1J_{\text{CP}} = 53$  Hz,  $^2J_{\text{CF}} = 37$  Hz,  $\text{CF}_2$ ); 120.1 (qtd,  $^1J_{\text{CF}} = 287$  Hz,  $^2J_{\text{CF}} = 33$  Hz,  $^2J_{\text{CP}} = 21$  Hz,  $\text{CF}_3$ ) (Figure 2).

### Isolation of $\text{P}(\text{CF}_3)_3$

A mixture of  $\text{P}(\text{OPh})_3$  (2.9 ml, 0.011 mol),  $\text{CsF}$  (1.08 g, 0.007 mol) and  $\text{PhCN}$  (3 ml) was de-aerated by three freeze, pump, thaw degas cycles.  $\text{CF}_3\text{SiMe}_3$  (5 ml, 0.03 mol) was then added at -196°C. The mixture was warmed slowly to room temperature, at which time a vigorous reaction occurred. The mixture was stirred for 1 hour. Trap to trap condensation using a vacuum line gave  $\text{P}(\text{CF}_3)_3$  (1.91 g, 80%).  $^{31}\text{P}$  NMR:  $\delta$ -3.6 (dectet,  $^2J_{\text{PF}} = 83$  Hz) [lit.<sup>11</sup> -2.5 (dectet,  $^2J_{\text{PF}} = 85$  Hz)].  $^{19}\text{F}$  NMR:  $\delta$ -51.6 (d) [lit.<sup>11</sup> -50.7 (d)].  $^{13}\text{C}$  NMR ( $d_8$ -toluene)  $\delta$  125.7 (qm,  $^1J_{\text{CF}} = 309$  Hz) (Figures 3a & 3b) [lit.<sup>11</sup> ( $\text{C}_6\text{D}_6$ ) 125.9 (q,  $^1J_{\text{CF}} = 318$  Hz)]. **Caution:**  $\text{P}(\text{CF}_3)_3$  is a spontaneously flammable gas (bp = 17 °C).<sup>12</sup>

It can be conveniently stored under air-free conditions in a radical inhibiting solvent such as toluene.<sup>13</sup>

### Isolation of P(C<sub>2</sub>F<sub>5</sub>)<sub>3</sub>

P(OPh)<sub>3</sub> (5.68 g, 18.2 mmol) was added to a mixture of dried CsF (2.31 g, 15.2 mmol) in benzonitrile (25 ml) under argon. C<sub>2</sub>F<sub>5</sub>SiMe<sub>3</sub> (9.02 g, 46.9 mmol) was added. The reaction was shaken intermittently over 10 minutes and left for 1 hour, during which a bottom layer of product separated from the mixture. The bottom layer was removed and distilled, at 60-62 °C, to give P(C<sub>2</sub>F<sub>5</sub>)<sub>3</sub> (5.18 g, 85%). <sup>31</sup>P NMR: δ 12.7 (septet of dectets) [lit.<sup>6</sup> 13.7 (septet of dectets)]. <sup>19</sup>F NMR: δ -82.6 (d, <sup>3</sup>J<sub>PF</sub> = 15 Hz, CF<sub>3</sub>); -106.7 (d, <sup>2</sup>J<sub>PF</sub> = 53 Hz, CF<sub>2</sub>) [lit.<sup>6</sup> -84.5 (d, <sup>3</sup>J<sub>PF</sub> = 16 Hz, CF<sub>3</sub>); -107.9(d, <sup>2</sup>J<sub>PF</sub> = 48 Hz, CF<sub>2</sub>)]. <sup>13</sup>C NMR: (CDCl<sub>3</sub>) δ 118.2 (qm, <sup>1</sup>J<sub>CF</sub> = 287 Hz, CF<sub>3</sub>); 117.6 (tq, <sup>1</sup>J<sub>CF</sub> = 298 Hz, <sup>2</sup>J<sub>CF</sub> = 45 Hz, CF<sub>2</sub>) (Figure 4).

### Isolation of P(C<sub>4</sub>F<sub>9</sub>)<sub>3</sub>

P(OC<sub>6</sub>H<sub>4</sub>CN)<sub>3</sub> (1.21 g, 3.1 mmol) was added to dried CsF (2.95 g, 19.4 mmol) in a Schlenk under argon. Benzonitrile (10 ml) and ether (10 ml) were added. C<sub>4</sub>F<sub>9</sub>SiMe<sub>3</sub> (6 ml, 19.7 mmol) was added by syringe and the mixture stirred rapidly. A colourless bottom layer of crude product separated from the mixture. This layer (1.5 g, 0.75 ml) was removed by syringe and distilled using a Hickman still to give P(C<sub>4</sub>F<sub>9</sub>)<sub>3</sub> (0.80 g, 40%). <sup>31</sup>P NMR: δ 21.8 (m) [lit.<sup>6</sup> 23.7 (m)]. <sup>19</sup>F NMR: δ -83.7 (s, CF<sub>3</sub>); -103.6 (d, <sup>2</sup>J<sub>PF</sub> = 33 Hz, PCF<sub>2</sub>); -120.6 (d, <sup>3</sup>J<sub>PF</sub> = 30 Hz, CF<sub>2</sub>CF<sub>2</sub>CF<sub>3</sub>); -128.5 (s, CF<sub>2</sub>CF<sub>3</sub>) [lit.<sup>6</sup> -83.7(s); -103.3(d, <sup>2</sup>J<sub>PF</sub> = 32 Hz); -120.1(d, <sup>3</sup>J<sub>PF</sub> = 30 Hz); -128.0(s)]. <sup>13</sup>C NMR: δ 127-108 (m, CF<sub>2</sub>'s); 119.5 (qt, <sup>1</sup>J<sub>CF</sub> = 287 Hz, <sup>2</sup>J<sub>CF</sub> = 33 Hz, CF<sub>3</sub>) (Figure 5).

### References

1. T. J. Hall and J. H. Hargis, *J. Org. Chem.*, 1986, **51**, 4185.
2. J. Chatt, W. Hussain, G. J. Leigh, M. Hapipah, C. J. Pickett and D. A. Rankin, *J. Chem. Soc., Dalton Trans.*, 1985, 1131.
3. V. A. Petrov, *Tetrahedron Lett.*, 2001, **42**, 3267.
4. P. Panne, D. Naumann and B. Hoge, *J. Fluorine Chem.*, 2001, **112**, 283.

5. J. D. Palcic, P. N. Kapoor, D. M. Roddick and R. G. Peters, *Dalton Trans.*, 2004, 1644.
6. J. J. Kampa, J. W. Nail and R. J. Lagow, *Angew. Chem. Int. Ed.*, 1995, **34**, 1241.
7. B. Hoge and C. Thösen, *Inorg. Chem.*, 2001, **40**, 3113.
8. I. G. Phillips, R. G. Ball and R. G. Cavell, *Inorg. Chem.*, 1988, **27**, 4038.
9. M. F. Ernst and D. M. Roddick, *Inorg. Chem.*, 1989, **28**, 1624.
10. R. G. Peters, B. L. Bennett, R. C. Schnabel and D. M. Roddick, *Inorg. Chem.*, 1997, **36**, 5962.
11. A. B. Burg, *Inorg. Nucl. Chem. Lett.*, 1977, **13**, 199.
12. F. W. Bennett, H. J. Emeléus and R. N. Haszeldine, *J. Chem. Soc.*, 1953, 1565.
13. W. Mahler, *Inorg. Chem.*, 1979, **18**, 352.

# Supplementary Material (ESI) for Chemical Communications  
 # This journal is © The Royal Society of Chemistry 2005

**Figure 1.**  $^1\text{H}$  NMR spectrum of  $\text{Ph}_2\text{PCl}_2\text{F}_5$  in  $\text{CDCl}_3$

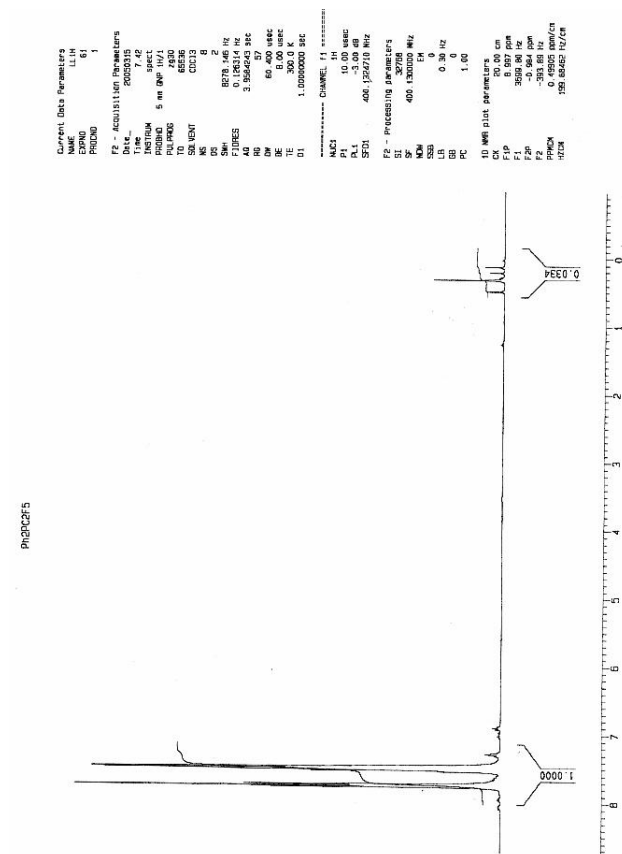

**Figure 2.**  $^{13}\text{C}$  NMR spectrum of  $\text{Ph}_2\text{PC}_2\text{F}_5$  in  $\text{CDCl}_3$

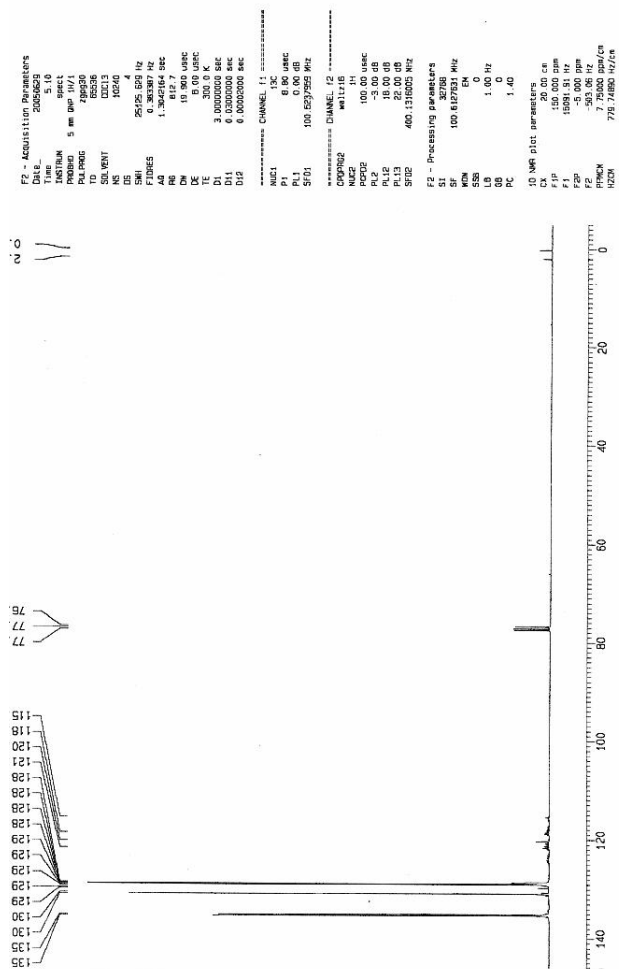



**Figure 3a.**  $^{13}\text{C}$  NMR spectrum of  $\text{P}(\text{CF}_3)_3$  in  $d_8$ -toluene

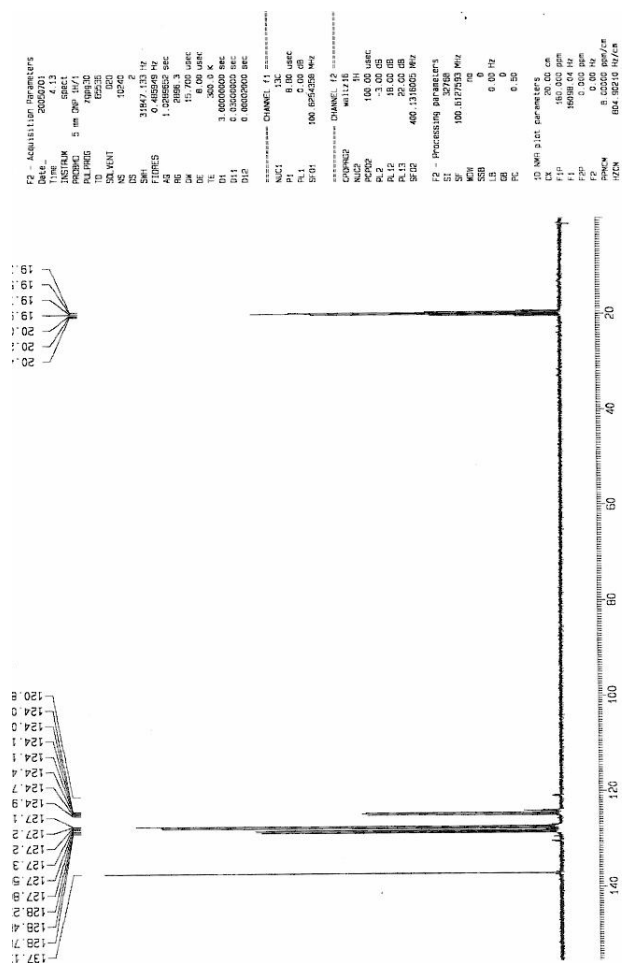

**Figure 3b. Expansion of  $^{13}\text{C}$  NMR spectrum of  $\text{P}(\text{CF}_3)_3$  in  $d_8$ -toluene**

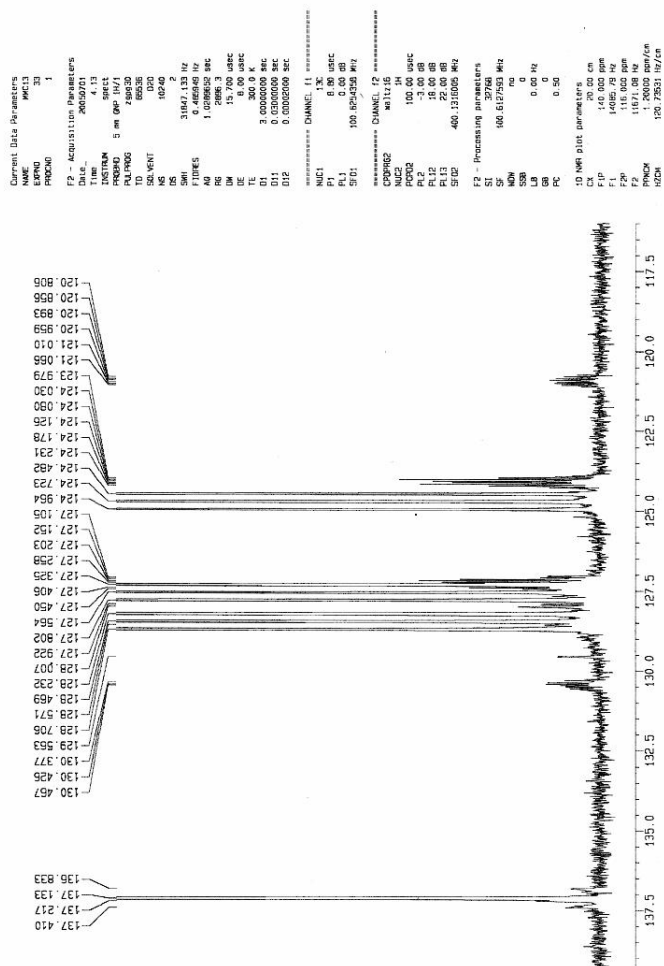

Figure 4.  $^{13}\text{C}$  NMR spectrum of  $\text{P}(\text{C}_2\text{F}_5)_3$  in  $\text{CDCl}_3$

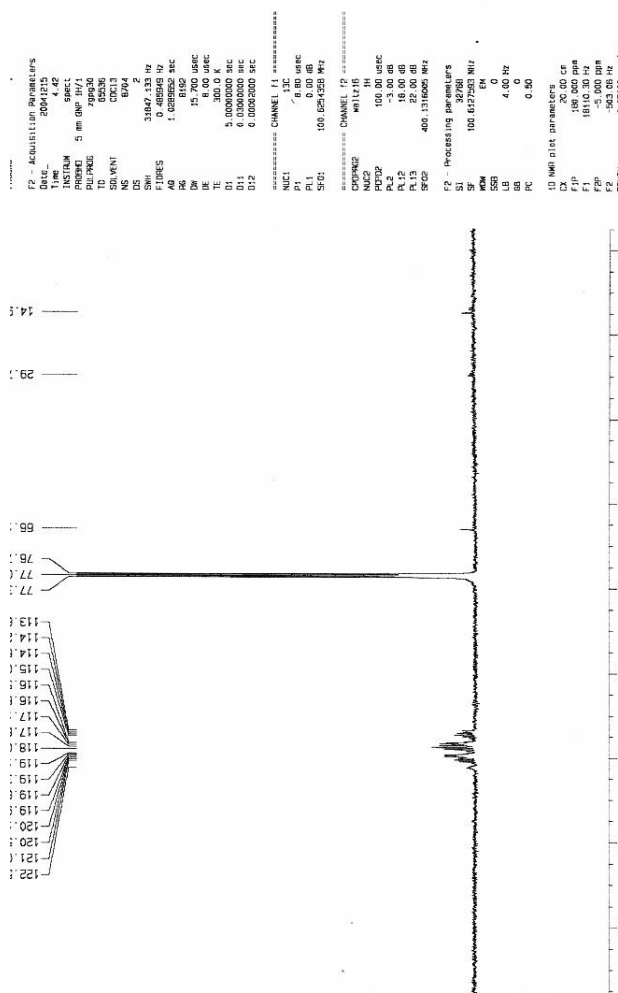

**Figure 5.**  $^{13}\text{C}$  NMR spectrum of neat  $\text{P}(\text{C}_4\text{F}_9)_3$

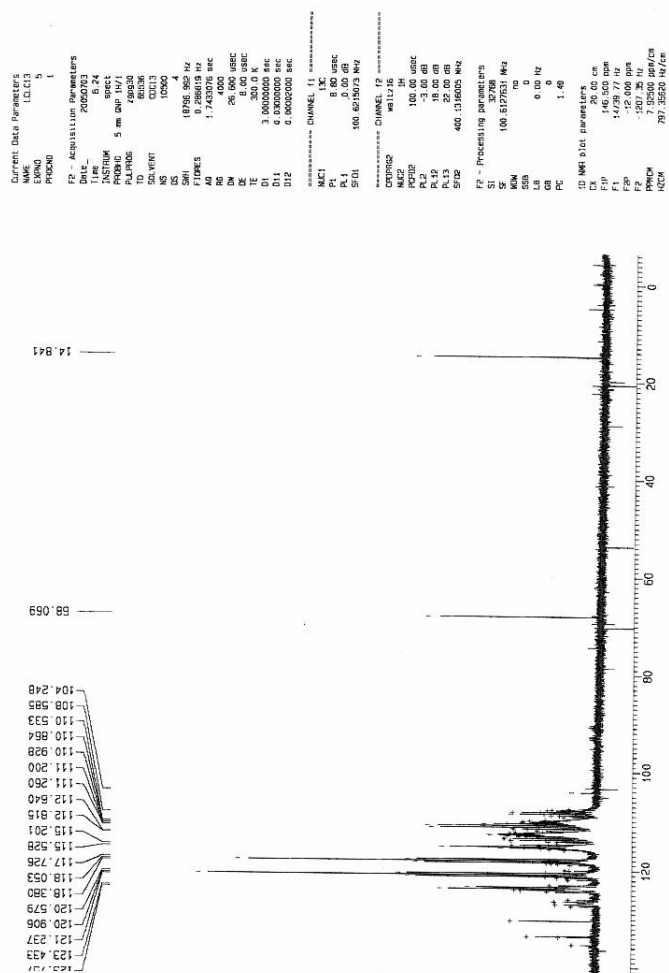

Supplement: b507752d.pdf [file b507752d.pdf]
